# Supplementary material
Source: Springer Nature journal article supplement (https://www.springermedizin.de/resource/supplementary/12967_2013_1562_MOESM2_ESM.pdf/9574346)

Patient NSCLC

Patient-derived NSCLC  
xenograft

*FGFR1* non-amp  
(model L104)

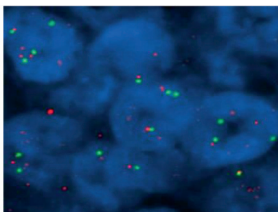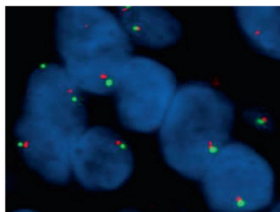

*FGFR1* amp  
(model L121)

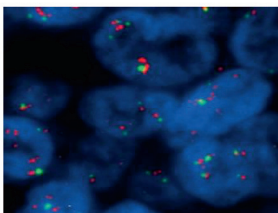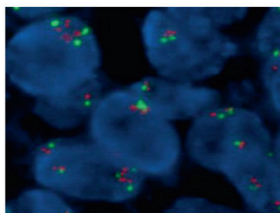

*FGFR1* amp  
(model L133)

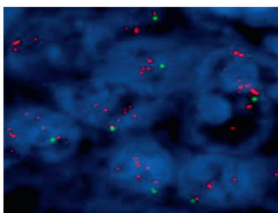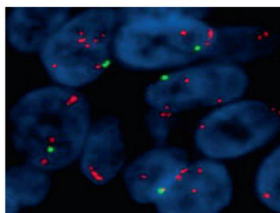

*cMET* non-amp  
(model L004)

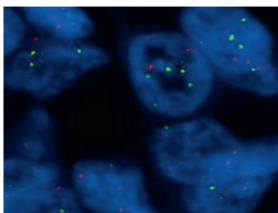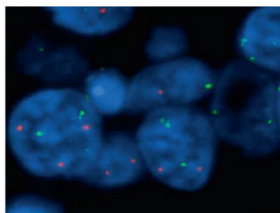

*cMET* amp  
(model L023)

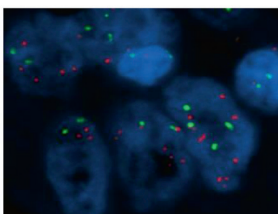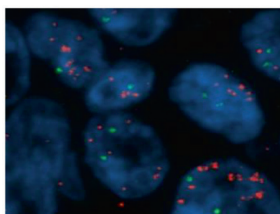

Supplement: MOESM2 [file 9574346]
